# Supplementary material for: Programmable multimetallic linear nanoassemblies of ruthenium–DNA conjugates
Source: Royal Society of Chemistry journal article supplement (doi:10.1039/c2ra21645k), 2012-01-01
Supplement: c2ra21645k.pdf [file c2ra21645k.pdf]

## Supplementary information

# Programmable multimetallic linear nanoassemblies of Ruthenium-DNA conjugates

Joris Irvoas, Arielle Noirot, Nadia Chouini-Lalanne, Olivier Reynes, Jean-Christophe Garrigues and Valerie Sartor\*

### Gel electrophoresis purification:

One example of gel purification of a synthesis carried on solid support. Visualization of the crude of reaction of the synthesis of **2m** and **2b** on 20 % denaturing polyacrylamide gel with three major bands corresponding of **2b**, **2m** and non-reacted DNA under UV light ( $\lambda = 254\text{nm}$  (left) and  $\lambda = 365\text{nm}$  (right)).

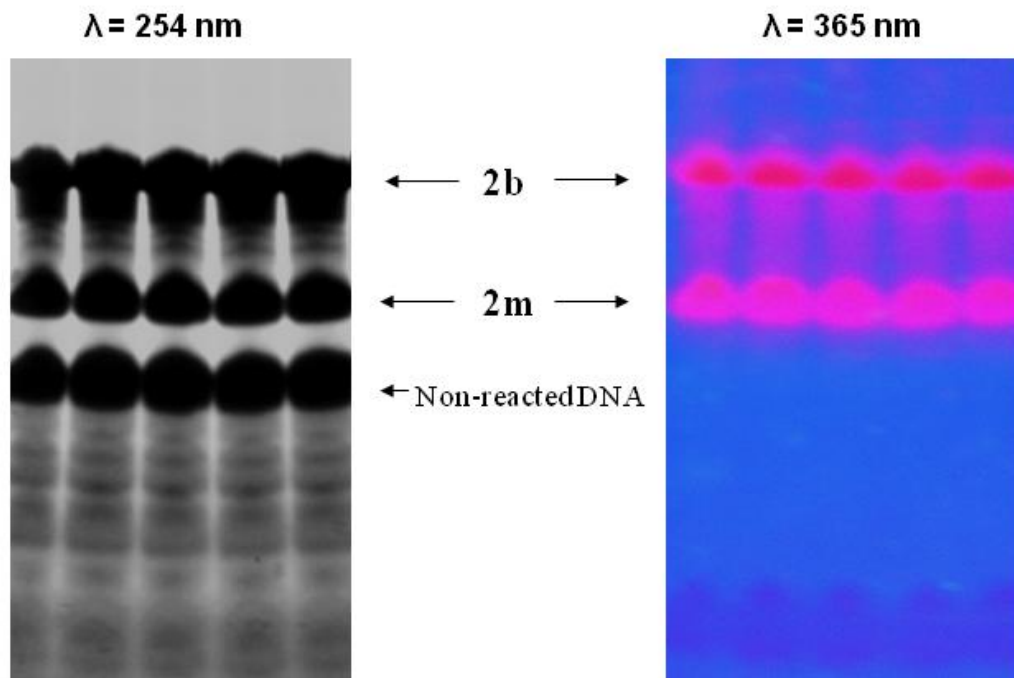



## High resolution electrospray mass values and spectra of DNA-Ruthenium complex conjugates.

| Sample | Molecular Formula                                                                      | Theoretical mass         |           | Experimental mass        |           | Difference<br>ppm |
|--------|----------------------------------------------------------------------------------------|--------------------------|-----------|--------------------------|-----------|-------------------|
|        |                                                                                        | H <sup>+</sup><br>Charge |           | H <sup>+</sup><br>Charge |           |                   |
| 1m     | C <sub>175</sub> H <sub>210</sub> N <sub>59</sub> O <sub>89</sub> P <sub>14</sub> Ru   | 4                        | 1273,7359 | 4                        | 1273,752  | 12,6              |
|        |                                                                                        | 5                        | 1019,1903 | 5                        | 1019,1924 | 2,1               |
| 2m     | C <sub>174</sub> H <sub>209</sub> N <sub>60</sub> O <sub>87</sub> P <sub>14</sub> Ru   | 4                        | 1265,9873 | 4                        | 1265,9893 | 1,6               |
|        |                                                                                        | 5                        | 1012,9914 | 5                        | 1012,9915 | 0,1               |
|        |                                                                                        | 6                        | 844,3274  | 6                        | 844,3308  | 4,0               |
| 2b     | C <sub>316</sub> H <sub>394</sub> N <sub>114</sub> O <sub>170</sub> P <sub>28</sub> Ru | 5                        | 1894,5562 | 5                        | 1894,6682 | 59,1              |
|        |                                                                                        | 6                        | 1578,9648 | 6                        | 1578,9386 | 16,6              |
|        |                                                                                        | 7                        | 1353,5424 | 7                        | 1353,625  | 61,0              |
| 3m     | C <sub>233</sub> H <sub>281</sub> N <sub>88</sub> O <sub>122</sub> P <sub>20</sub> Ru  | 3                        | 2327,0851 | 3                        | 2327,0852 | 0,0               |
|        |                                                                                        | 4                        | 1745,5658 | 4                        | 1745,5606 | 3,0               |
|        |                                                                                        | 5                        | 1396,6542 | 5                        | 1396,6616 | 5,3               |
| 4m     | C <sub>231</sub> H <sub>283</sub> N <sub>78</sub> O <sub>126</sub> P <sub>20</sub> Ru  | 4                        | 1721,0569 | 4                        | 1721,043  | 8,1               |
|        |                                                                                        | 5                        | 1377,0471 | 5                        | 1377,079  | 23,2              |
|        |                                                                                        | 6                        | 1147,7072 | 6                        | 1147,7289 | 18,9              |
| 4b     | C <sub>430</sub> H <sub>542</sub> N <sub>150</sub> O <sub>248</sub> P <sub>40</sub> Ru | 5                        | 2622,6677 | 5                        | 2622,8994 | 88,3              |
|        |                                                                                        | 6                        | 2185,7244 | 6                        | 2185,9023 | 81,4              |
|        |                                                                                        | 7                        | 1873,622  | 7                        | 1873,9703 | 185,9             |
| 5m     | C <sub>271</sub> H <sub>330</sub> N <sub>101</sub> O <sub>147</sub> P <sub>24</sub> Ru | 5                        | 1638,8924 | 5                        | 1638,973  | 49,2              |
|        |                                                                                        | 6                        | 1365,9117 | 6                        | 1365,98   | 50,0              |
|        |                                                                                        | 7                        | 1170,9254 | 7                        | 1170,936  | 9,1               |

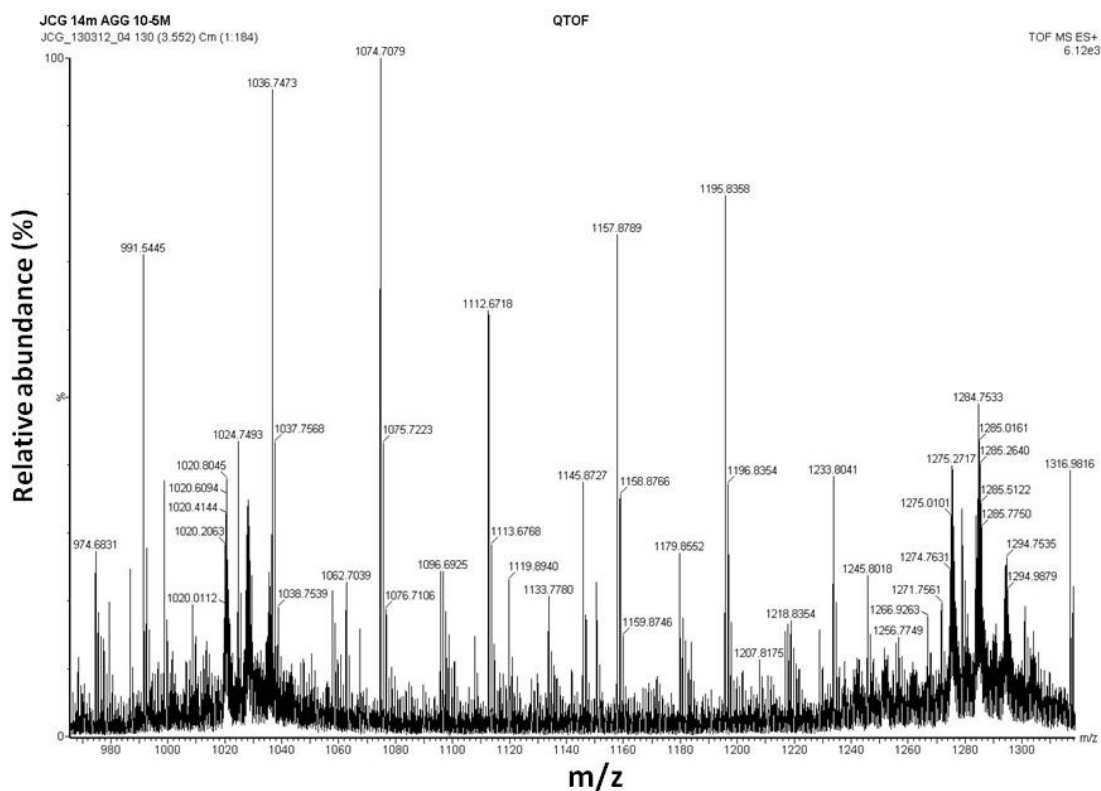

High resolution electrospray mass spectrum of **1m**.

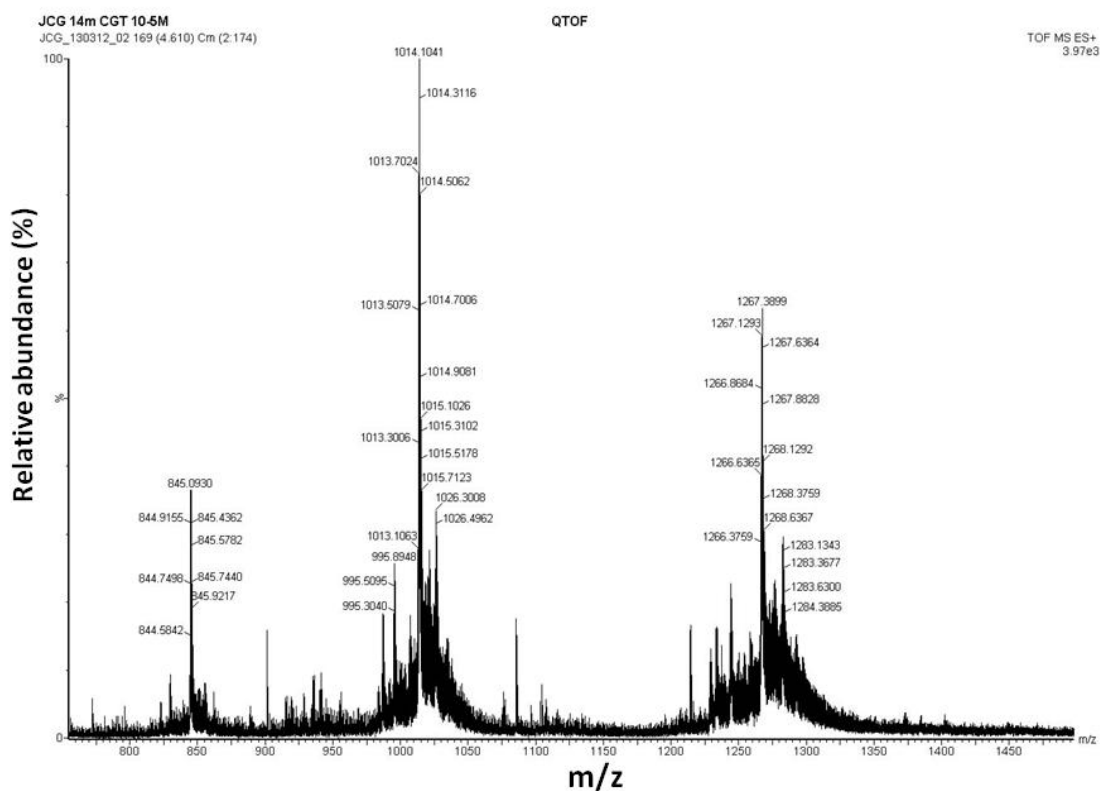

High resolution electrospray mass spectrum of **2m**.

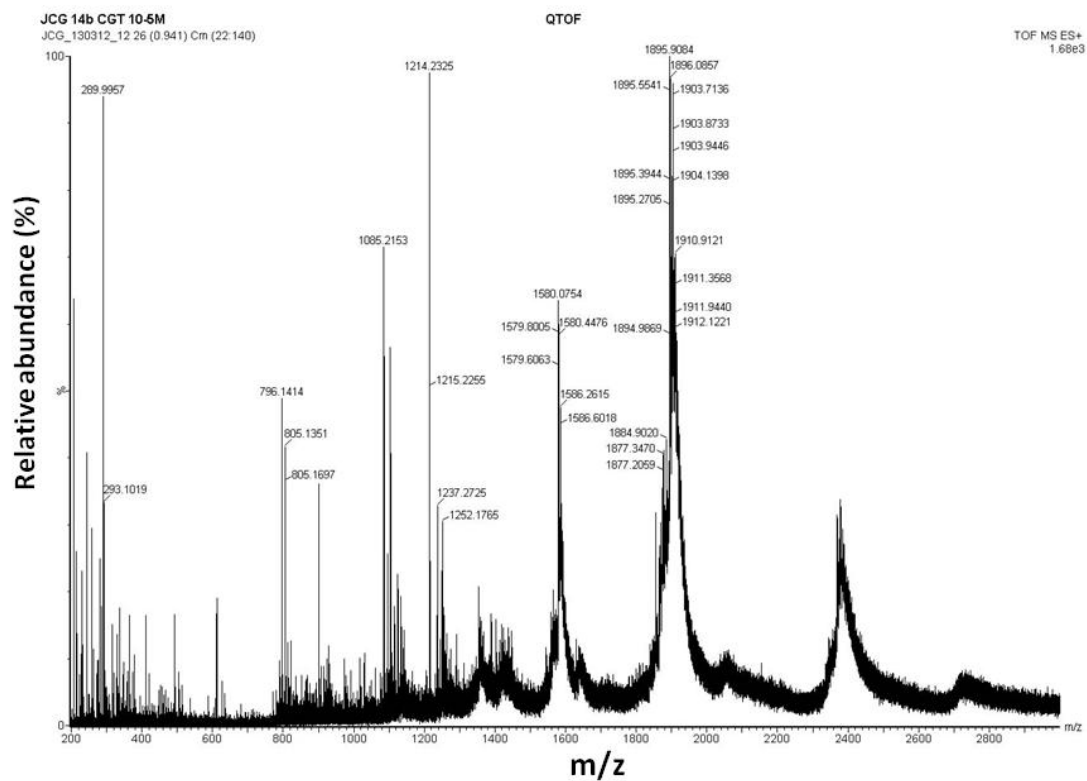

High resolution electrospray mass spectrum of **2b**.

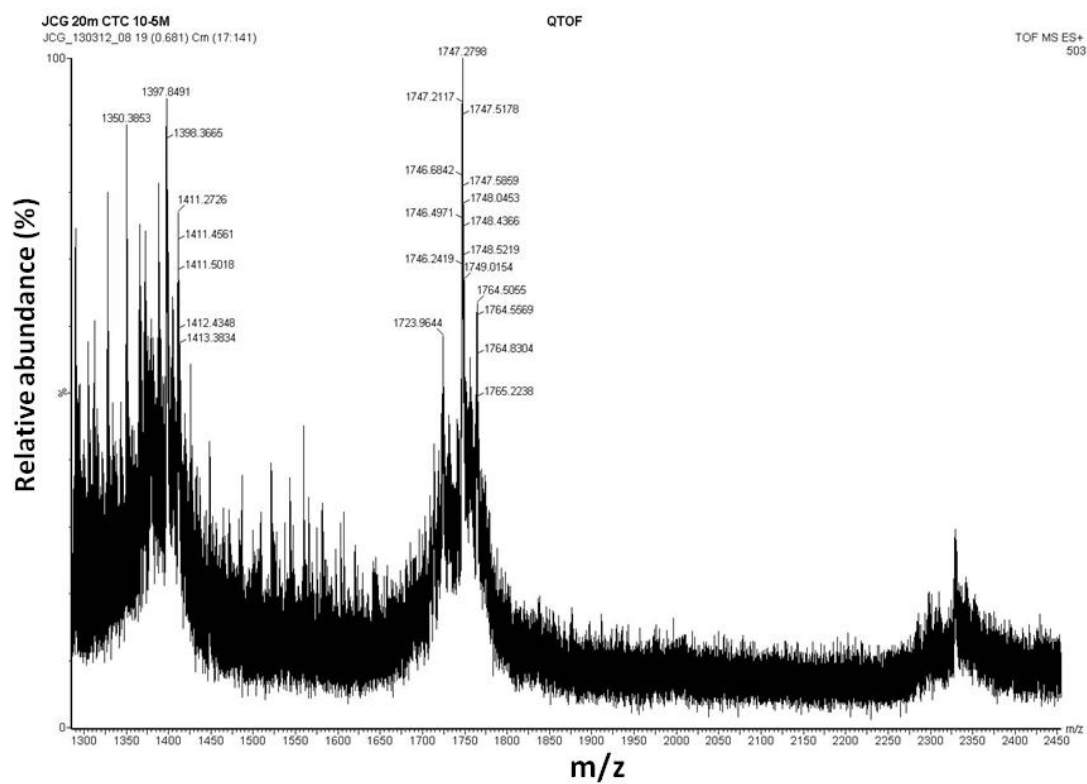

High resolution electrospray mass spectrum of **3m**.

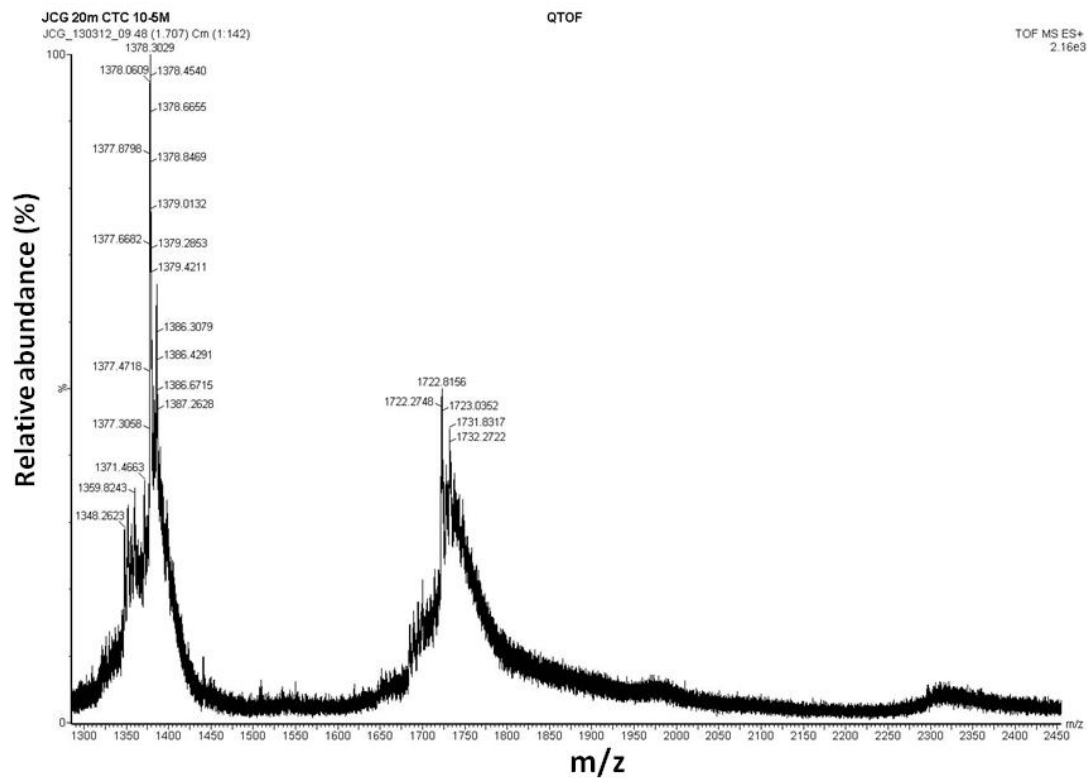

High resolution electrospray mass spectrum of **4m**.

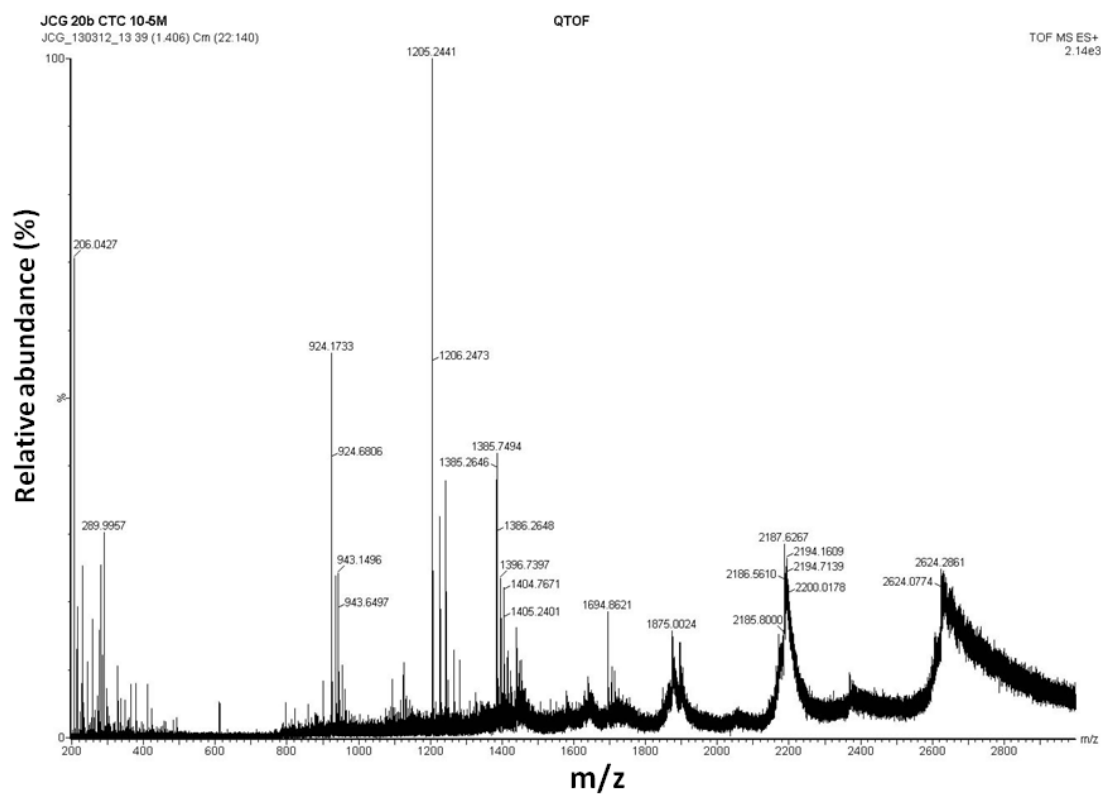

High resolution electrospray mass spectrum of **4b**.

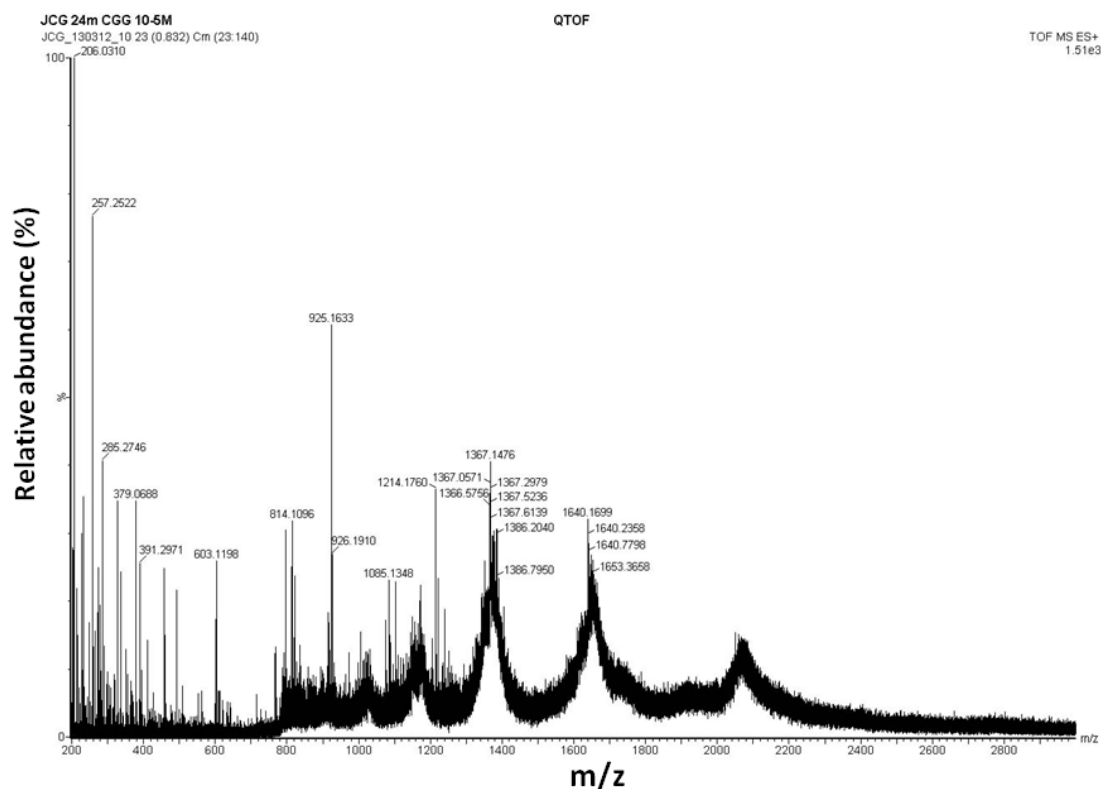

High resolution electrospray mass spectrum of **5m**.

## PAGE of Multimetallic linear nanoassemblies of Ruthenium-DNA conjugates

Polyacrylamide gel electrophoresis of the first duplexes composed of no, one or two ruthenium complexes in native condition (20 % polyacrylamide) and visualized under UV light ( $\lambda = 254\text{nm}$ ) (left) and on safe imager<sup>TM</sup> 2.0 blue light transilluminator (right).

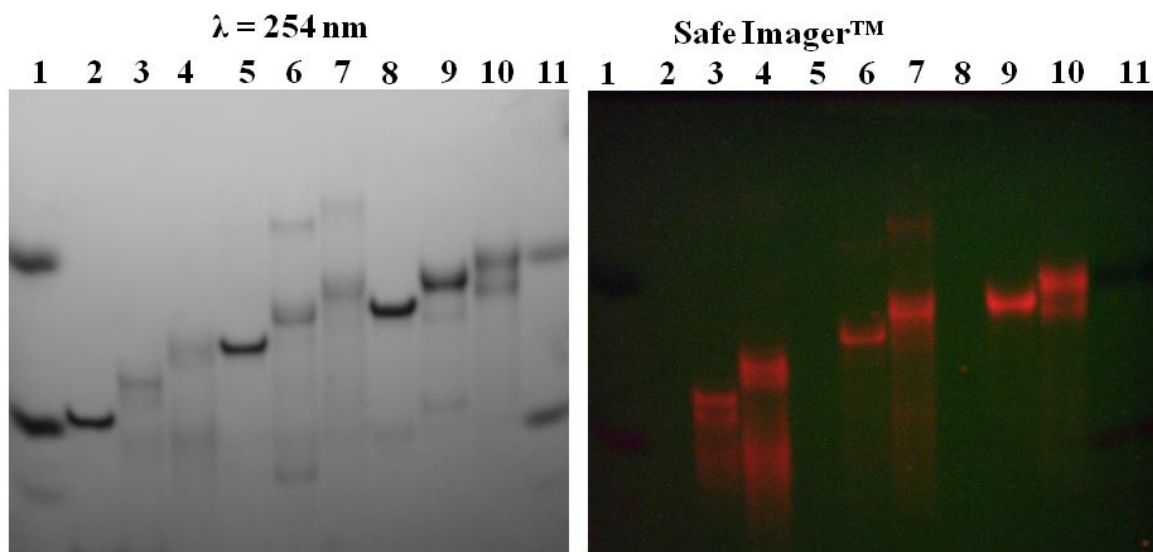

Lanes 1 and 11: two products for migration control, upper: xylene cyanol, lower: bromophenol blue; lane 2: **1 + 2**; lane 3: **1m + 2**; lane 4: **1m + 2m**; lane 5: **3 + 4**; lane 6: **3m + 4**; lane 7: **3m + 4m**; lane 8: **5 + 6**; lane 9: **5m + 6**; lane 10: **5m + 6m**.

Polyacrylamide gel electrophoresis of the longer linear assemblies composed of three to seven ruthenium complexes in native conditions (12 % polyacrylamide) and visualized under UV light ( $\lambda = 254\text{nm}$ ) (left) and on safe imager<sup>TM</sup> 2.0 blue light transilluminator (right).

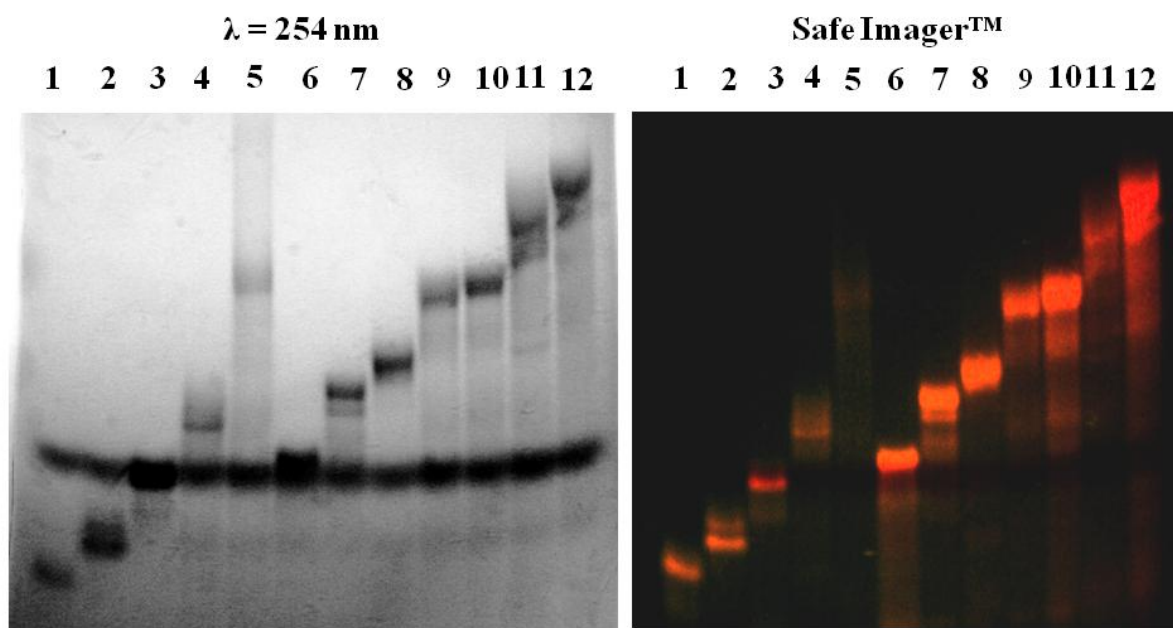

Lane 1: **2b**; lane 2: **4b**; lane 3: **6b**; lane 4: **7b**; lane 5: **8b**; lane 6: **2b** + 2x**1m**; lane 7: **4b** + 2x**3m**; lane 8: **6b** + 2x**5m**; lane 9: **7b** + 2x**1** + 2x**3m**; lane 10: **7b** + 2x**1m** + 2x**3m**; lane 11: **8b** + 2x**1** + 2x**3** + 2x**5m**; lane 12: **8b** + 2x**1m** + 2x**3m** + 2x**5m**.

### Fluorescence spectra of linear assemblies.

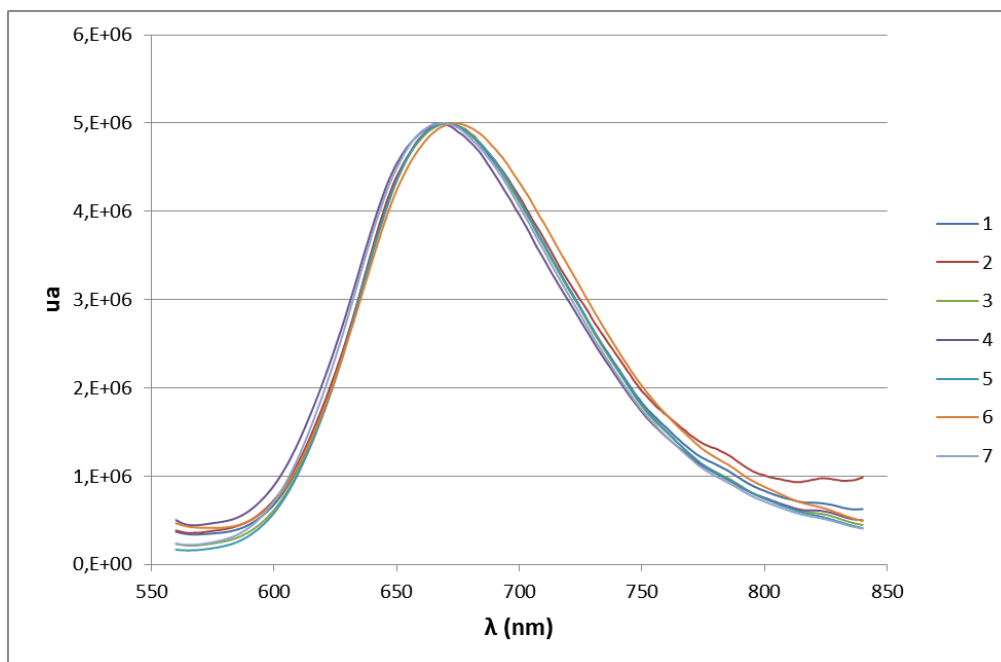

curve 1: **2b** + 2x**1m**; curve 2: **4b** + 2x**3m**; curve 3: **6b** + 2x**5m**; curve 4: **7b**+2x**1** + 2x**3m**;  
curve 5: **7b** + 2x**1m** + 2x**3m**; curve 6: **8b** + 2x**1** + 2x**3** + 2x**5m**; curve 7: **8b** + 2x**1m** + 2x**3m** + 2x**5m**



## T<sub>m</sub> curves of linear assemblies

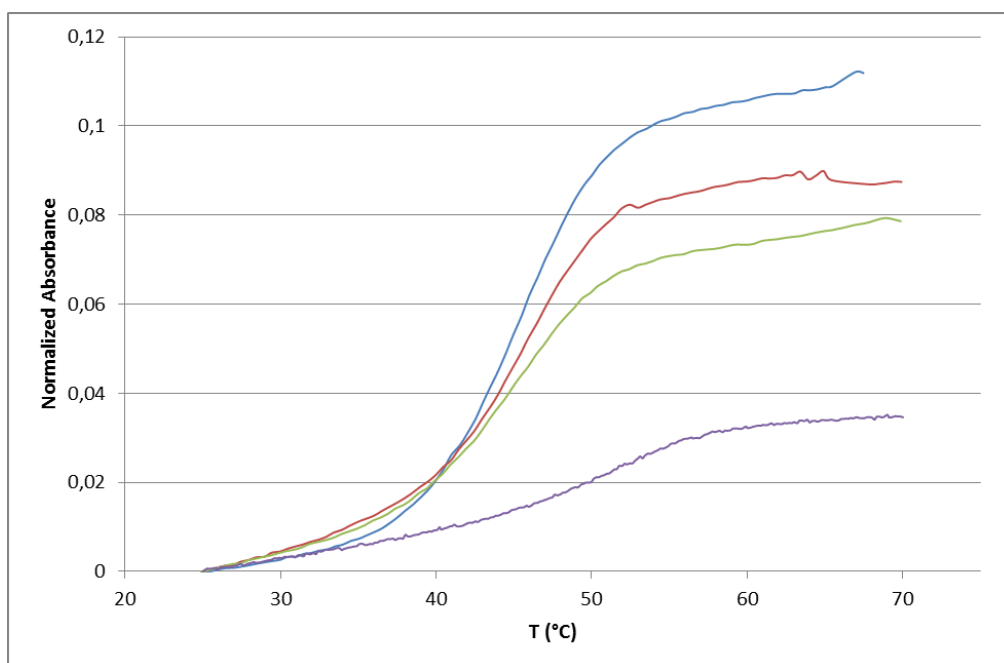

T<sub>m</sub> curves - Blue: **1+2**; Red: **1m+2**; Green: **1m+2m**; Purple: **2b+2x1m**

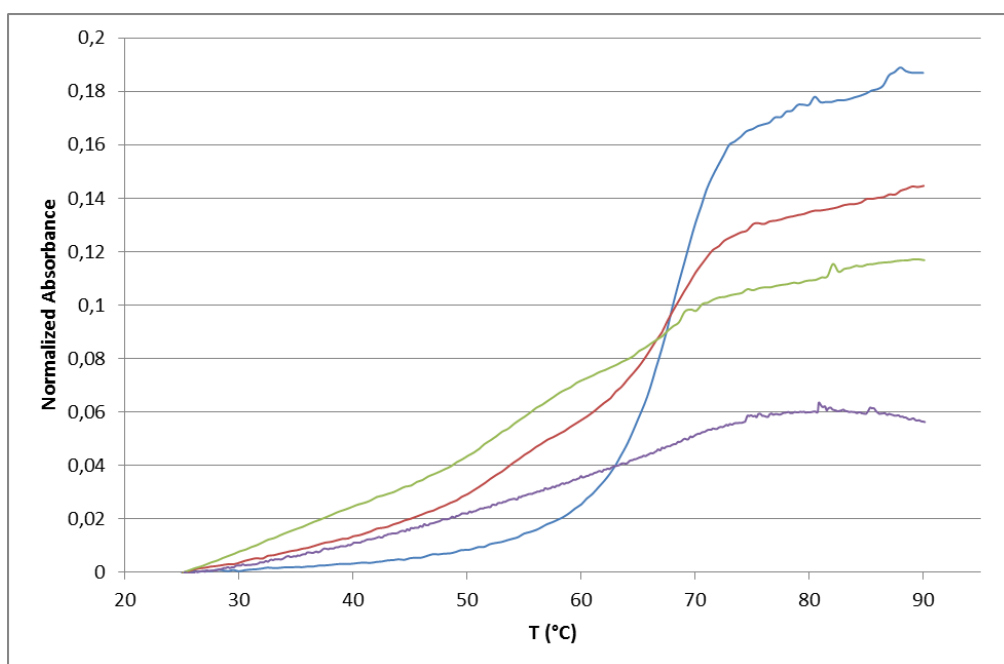

T<sub>m</sub> curves - Blue: **3+4**; Red: **3m+4**; Green: **3m+4m**; Purple: **4b+2x3m**

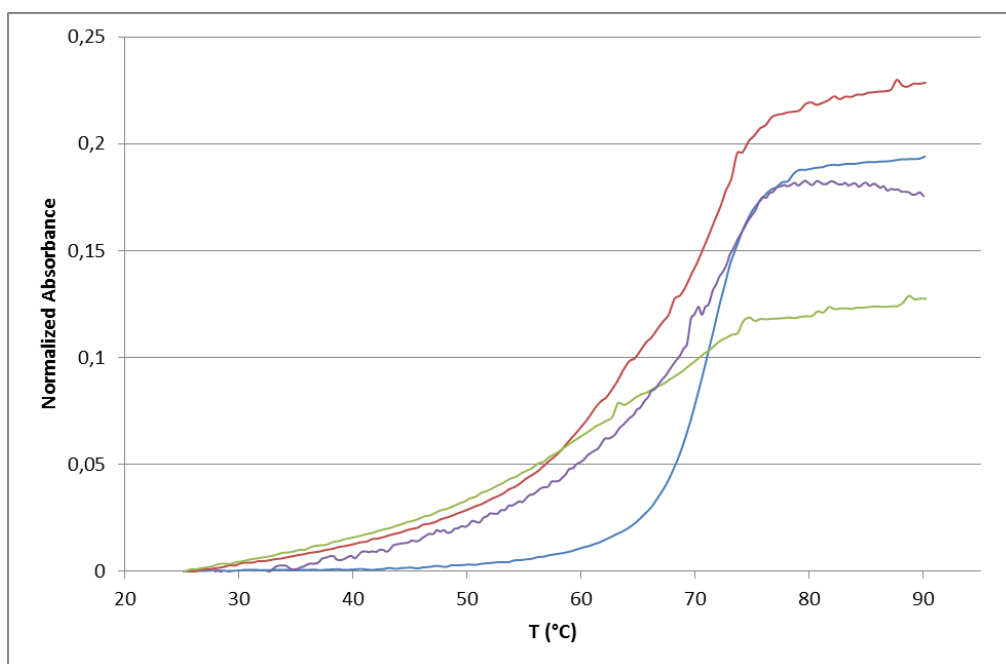

T<sub>m</sub> curves - Blue: **5+6**; Red: **5m+6**; Green: **5m+6m**; Purple: **6b+2x5m**

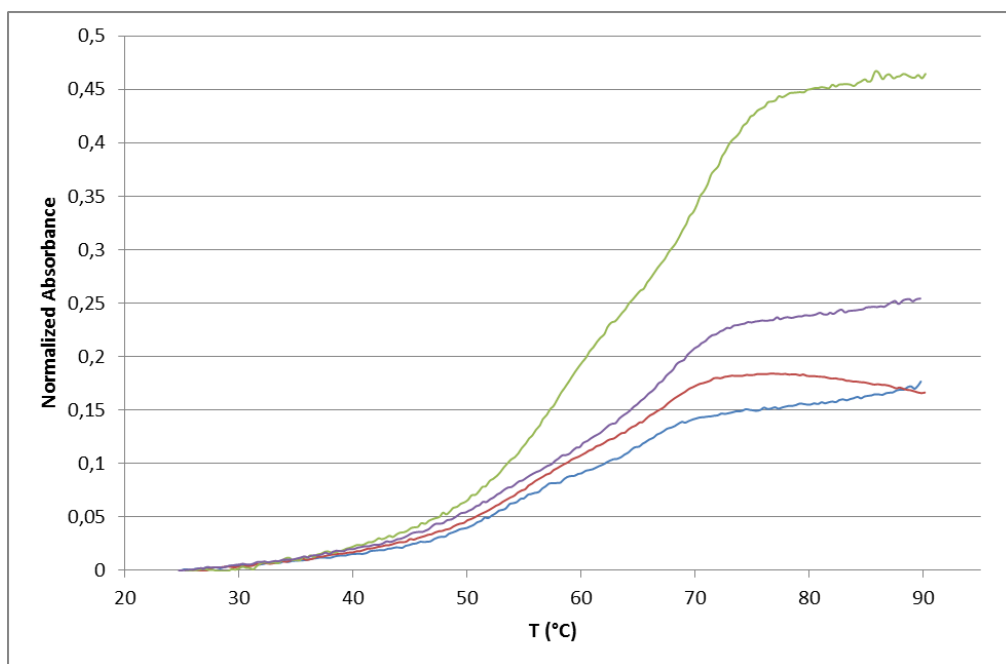

T<sub>m</sub> curves - Blue: **7b + 2x1 + 2x3m**; Red: **7b + 2x1m + 2x3m**; Green: **8b + 2x1 + 2x3 + 2x5m**; Purple: **8b + 2x5m + 2x3m + 2x1m**

## Circular Dichroism of linear assemblies

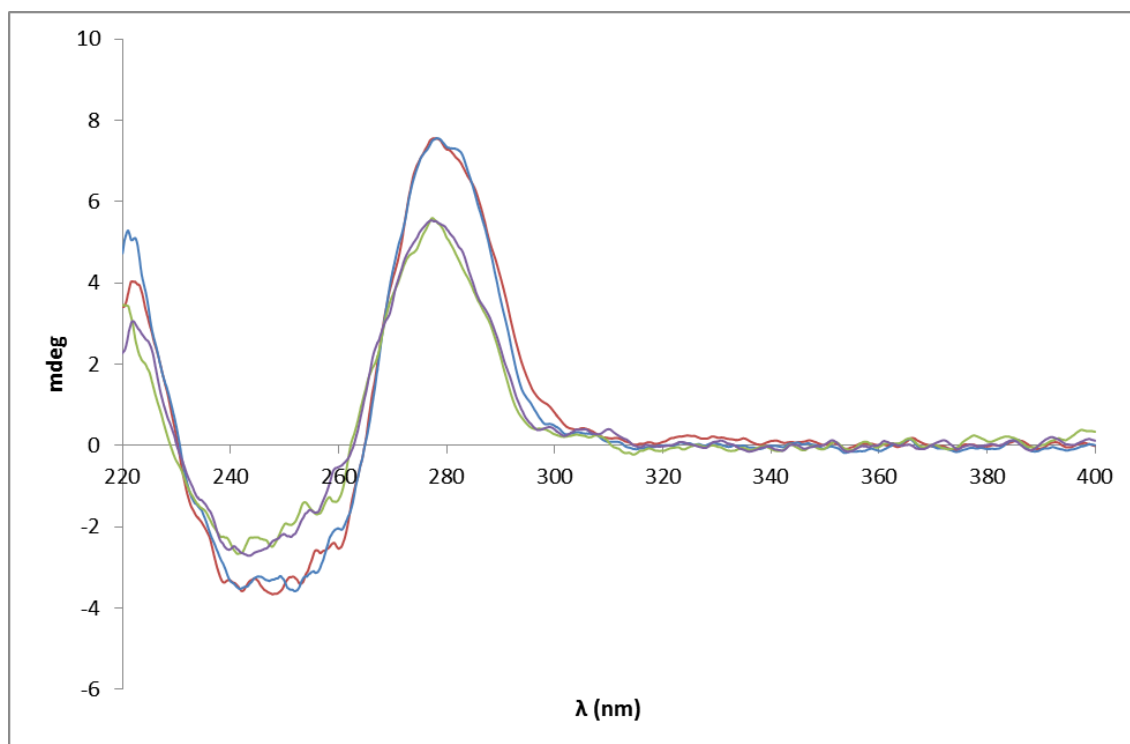

Red: **1+2**; Blue: **1m+2**; Green: **1m+2m**; Purple: **2b+2x1m**

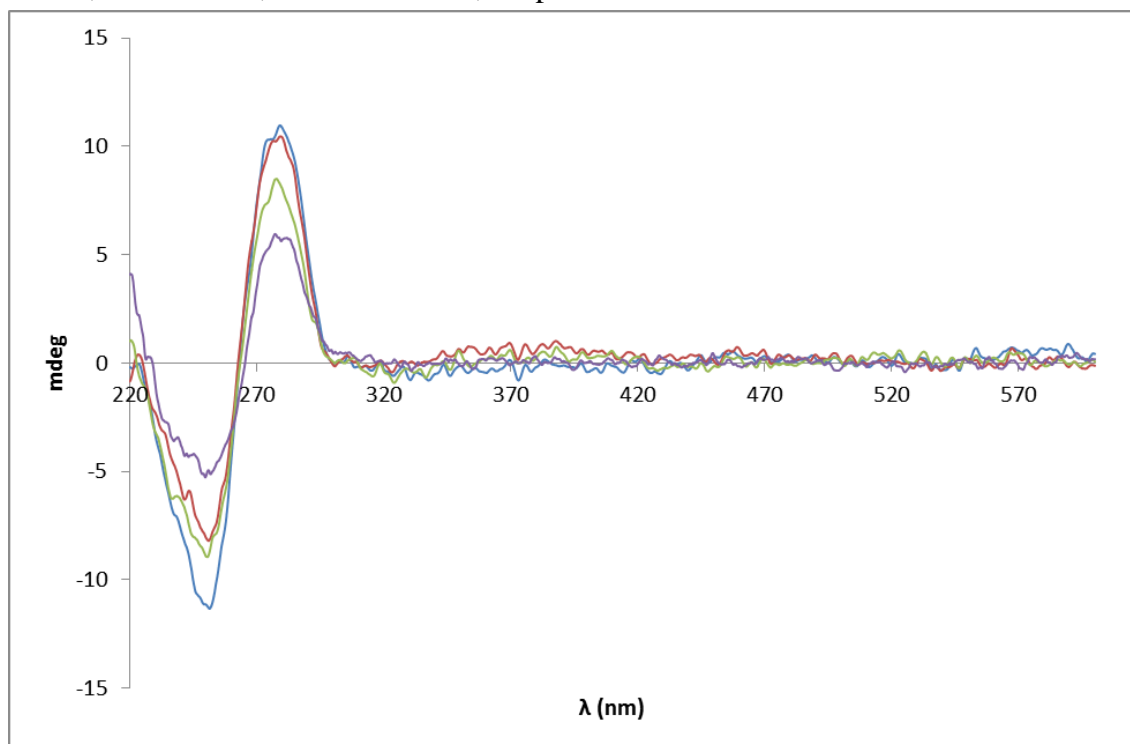

Red: **3+4**; Blue: **3m+4**; Green: **3m+4m**; Purple: **4b+2x3m**

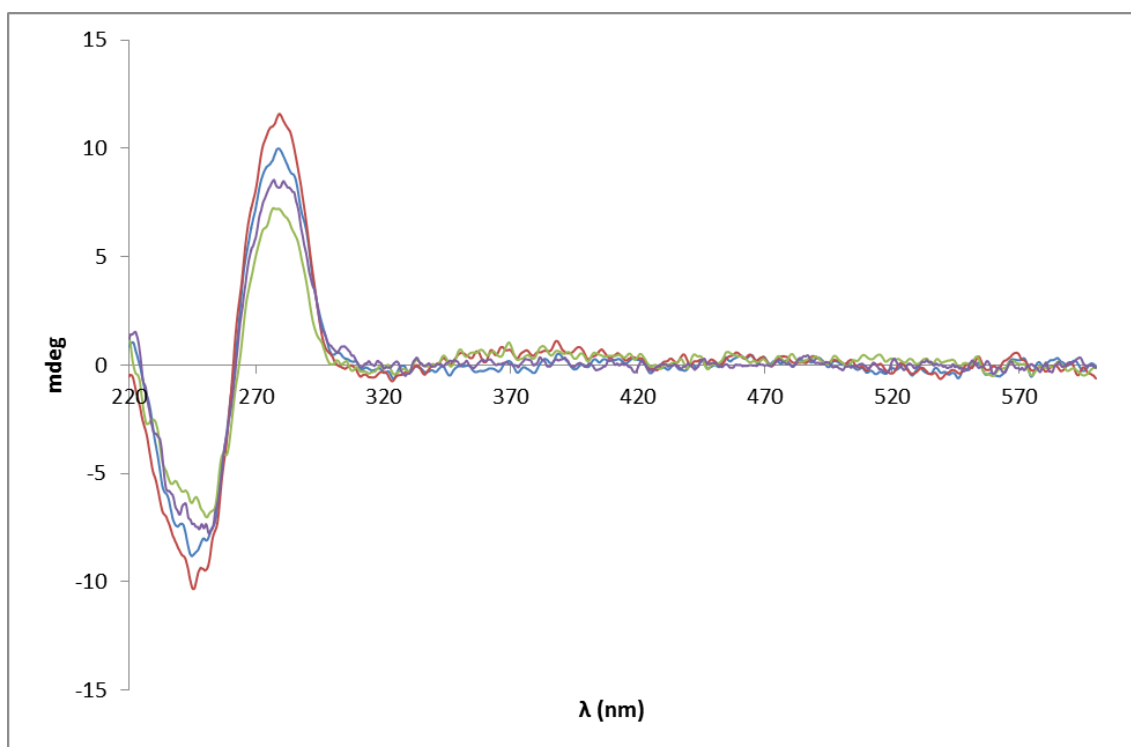

Red: **5+6**; Blue: **5m+6**; Green: **5m+6m**; Purple: **6b+2x5m**

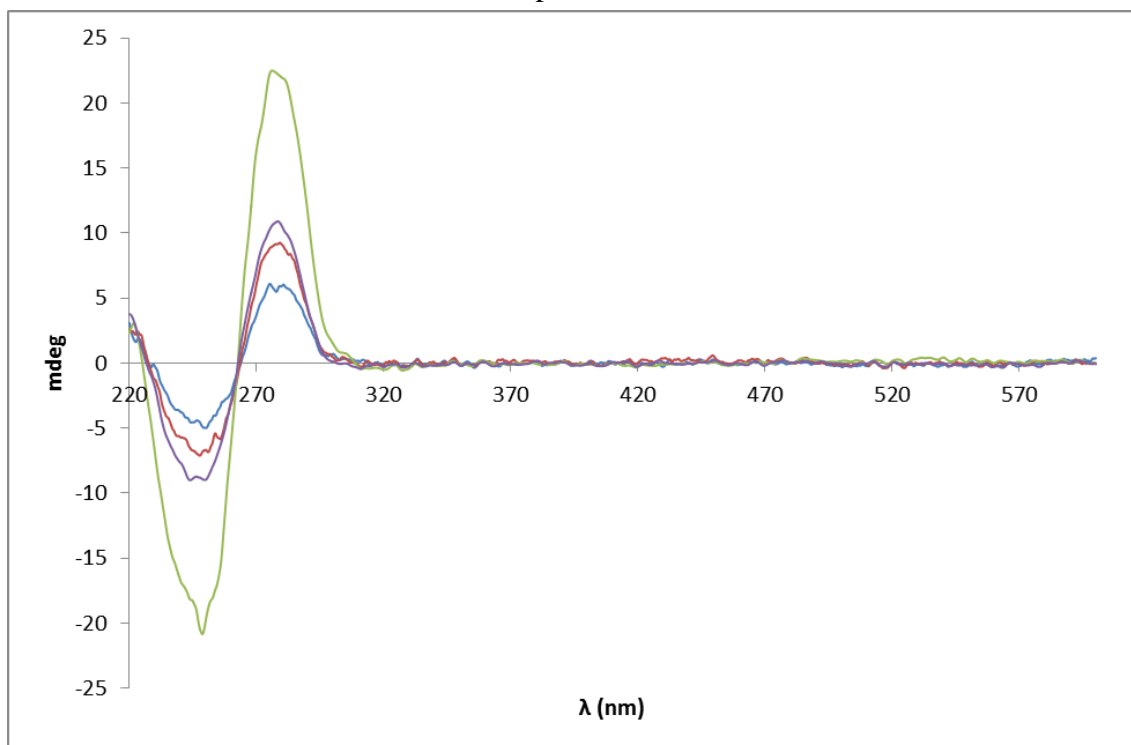

Red: **7b+2x1+2x3m**; Blue: **7b+2x1m+2x3m**; Green: **8b+2x1+2x3+2x5m**; Purple: **8b+2x1m+2x3m+2x5m**
